# Supplementary material for: MOF-Derived Ni1−xCox@Carbon with Tunable Nano–Microstructure as Lightweight and Highly Efficient Electromagnetic Wave Absorber
Source: PubMed Central journal article supplement (PMC7770844; doi:10.1007/s40820-020-00488-0), 2020-07-15
Supplement: 40820_2020_488_MOESM1_ESM.pdf [file 40820_2020_488_MOESM1_ESM.pdf]

Supporting Information for

## MOF-Derived $\text{Ni}_{1-x}\text{Co}_x\text{@Carbon}$ with Tunable Nano-Micro Structure as Lightweight and Highly Efficient Electromagnetic Wave Absorber

Lei Wang<sup>1</sup>, Mengqiu Huang<sup>1</sup>, Xuefeng Yu<sup>1</sup>, Wenbin You<sup>1</sup>, Jie Zhang<sup>1</sup>, Xianhu Liu<sup>2</sup>, Min Wang<sup>1</sup>, Renchao Che<sup>1, \*</sup>

<sup>1</sup>Laboratory of Advanced Materials, Department of Materials Science and Collaborative Innovation Center of Chemistry for Energy Materials (iChem), Fudan University, Shanghai 200438, People's Republic of China

<sup>2</sup>Key Laboratory of Materials Processing and Mold (Zhengzhou University), Ministry of Education, Zhengzhou 450002, People's Republic of China

\*Corresponding author. E-mail: [rcche@fudan.edu.cn](mailto:rcche@fudan.edu.cn) (Renchao Che)

### Supplementary Table and Figures

**Table S1** Information of MOF-derived  $\text{Ni}_{1-x}\text{Co}_x\text{@Carbon}$  composites

| Sample                                    | Size (um) | $I_D/I_G$ | $M_s$ (emu/g) |
|-------------------------------------------|-----------|-----------|---------------|
| Ni@C                                      | 1.5~2     | 0.92      | 138.5         |
| $\text{Ni}_{0.8}\text{Co}_{0.2}\text{@C}$ | 3         | 1.06      | 131.4         |
| $\text{Ni}_{0.5}\text{Co}_{0.5}\text{@C}$ | 8         | 0.95      | 121.1         |
| $\text{Ni}_{0.2}\text{Co}_{0.8}\text{@C}$ | 10        | 0.98      | 100.7         |
| CoO@C                                     | 30        | -         | 47.2          |

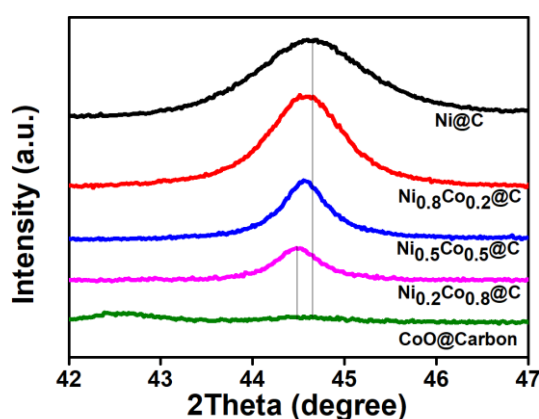

**Fig. S1** XRD of obtained  $\text{Ni}_{1-x}\text{Co}_x\text{@Carbon}$  composites

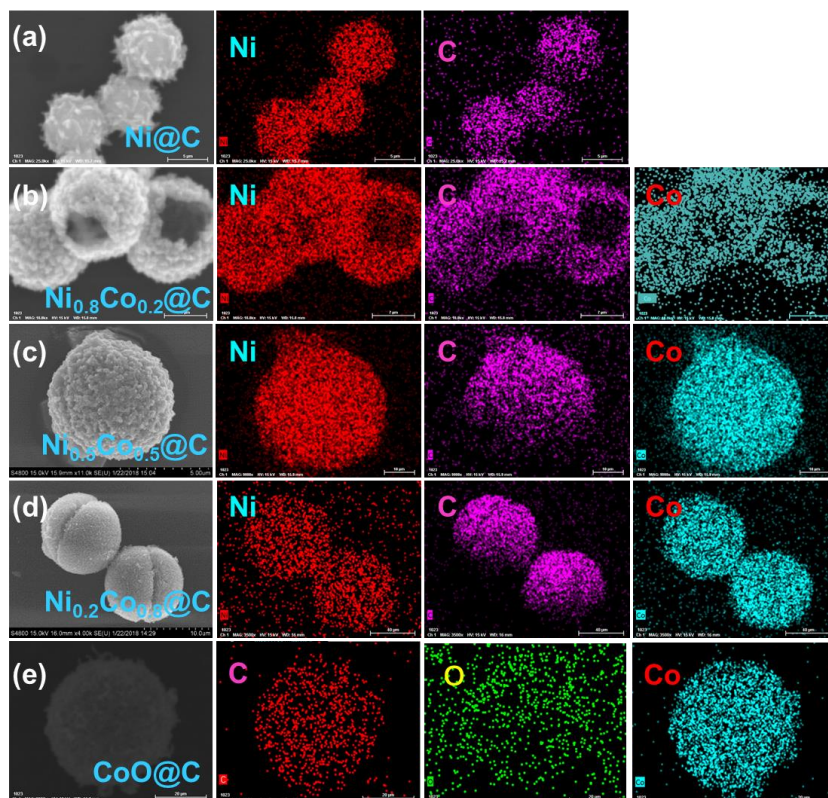

**Fig. S2** Elements mapping distribution of (a) Ni@C, (b) Ni<sub>0.8</sub>Co<sub>0.2</sub>@C, (c) Ni<sub>0.5</sub>Co<sub>0.5</sub>@C, (d) Ni<sub>0.2</sub>Co<sub>0.8</sub>@C, and (e) CoO@C composites.

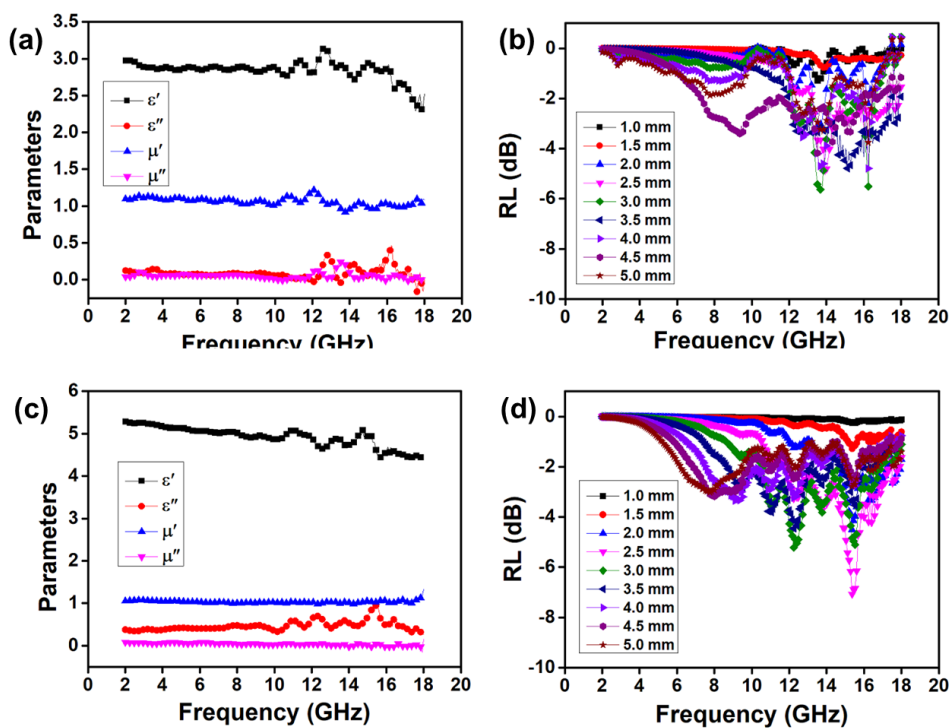

**Fig. S3** Electromagnetic parameters (a, c) and microwave absorption (b, d) of obtained CoO@C composites at 25% and 40% mass adding, respectively

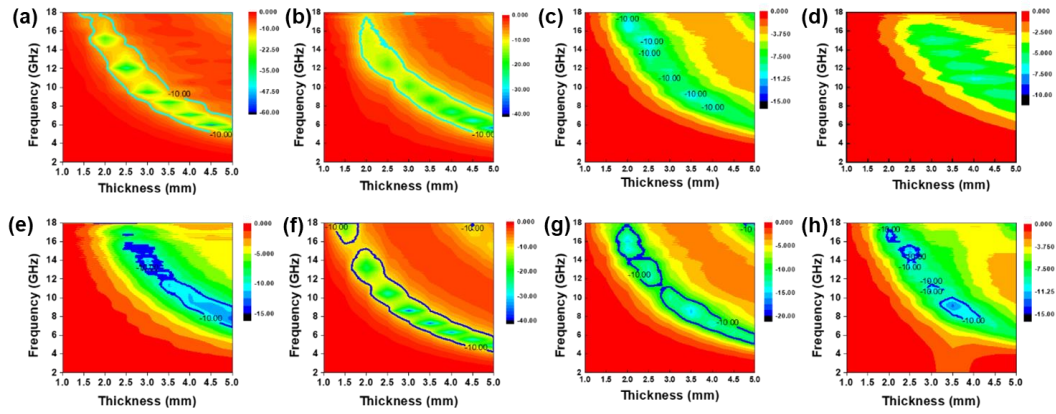

**Fig. S4** Efficient absorption areas of (a, e) Ni@C, (b, f) Ni<sub>0.8</sub>Co<sub>0.2</sub>@C, (c, g) Ni<sub>0.5</sub>Co<sub>0.5</sub>@C, (d, h) and Ni<sub>0.2</sub>Co<sub>0.8</sub>@C composites at 25% and 40% mass adding, respectively

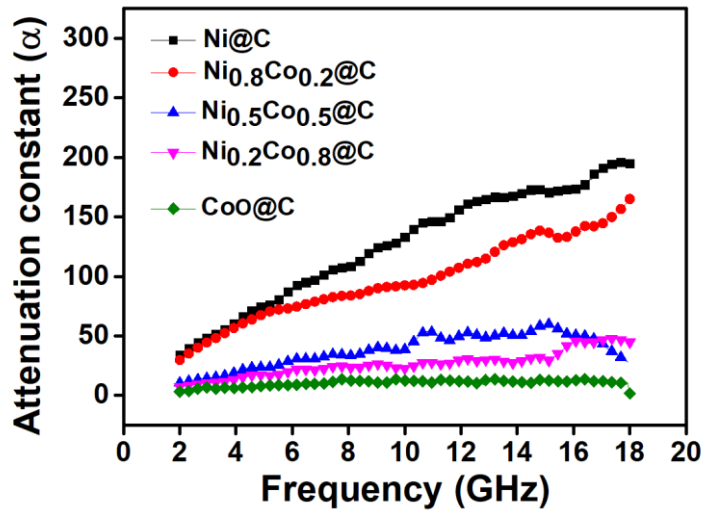

**Fig. S5** Attenuation constant  $\alpha$  of MOF-derived Ni<sub>1-x</sub>Co<sub>x</sub>@C composites
